# Supplementary material for: Unraveling Fungal Radiation Resistance Regulatory Networks through the Genome-Wide Transcriptome and Genetic Analyses of Cryptococcus neoformans
Source: PubMed Central journal article supplement (PMC5137497; doi:10.1128/mbio.01483-16), 2016-11-29

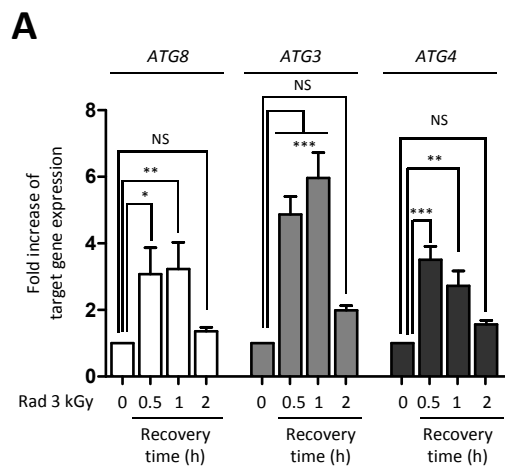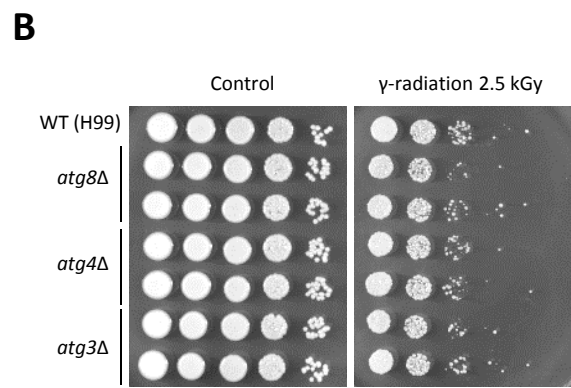

Supplement: mbo006163087sf5.pdf [file mbo006163087sf5.pdf]
