# Supplementary material for: Unraveling Fungal Radiation Resistance Regulatory Networks through the Genome-Wide Transcriptome and Genetic Analyses of Cryptococcus neoformans
Source: PubMed Central journal article supplement (PMC5137497; doi:10.1128/mbio.01483-16), 2016-11-29
Supplement: mbo006163087st1.pdf [file mbo006163087st1.pdf]

**Table S1.** Strains used in this study

| Strain  | Genotype                                                                                            | Parent  | Reference  |
|---------|-----------------------------------------------------------------------------------------------------|---------|------------|
| BY4742  | <i>S. cerevisiae</i> MAT $\alpha$ . his3 $\Delta$ 1 leu2 $\Delta$ 0 lys2 $\Delta$ 0 ura3 $\Delta$ 0 | S288C   | (1)        |
| SC5314  | <i>C. albicans</i> wild-type                                                                        |         | (2)        |
| BG2     | <i>C. glabrata</i> clinical isolate                                                                 |         | (3)        |
| H99     | MAT $\alpha$ serotype A                                                                             |         | (4)        |
| JEC21   | MAT $\alpha$ serotype D                                                                             |         | (5)        |
| R265    | MAT $\alpha$ VGIIa                                                                                  |         | (6)        |
| WM276   | MAT $\alpha$ VGI                                                                                    |         | (6)        |
| YSB552  | MAT $\alpha$ . ire1 $\Delta$ ::NAT-STM#224                                                          | H99     | (7)        |
| YSB1000 | MAT $\alpha$ . ire1 $\Delta$ ::NAT-STM#224 IRE1-NEO                                                 | YSB552  | (7)        |
| YSB723  | MAT $\alpha$ . hxl1 $\Delta$ ::NAT-STM#295                                                          | H99     | (7)        |
| YSB762  | MAT $\alpha$ . hxl1 $\Delta$ ::NAT-STM#295 HXL1-NEO                                                 | YSB723  | (7)        |
| YSB2493 | MAT $\alpha$ . sre1 $\Delta$ ::NAT-STM#240                                                          | H99     | (8)        |
| YSB2308 | MAT $\alpha$ . hob1 $\Delta$ ::NAT-STM#213                                                          | H99     | (8)        |
| YSB596  | MAT $\alpha$ . srx1 $\Delta$ ::NAT-STM#125                                                          | H99     | (9)        |
| YSB1214 | MAT $\alpha$ . srx1 $\Delta$ ::NAT-STM#125 SRX1-NEO                                                 | YSB596  | (9)        |
| YSB1273 | MAT $\alpha$ . tsa1 $\Delta$ ::NEO                                                                  | H99     | (9)        |
| YSB1204 | MAT $\alpha$ . tsa3 $\Delta$ ::NEO                                                                  | H99     | (9)        |
| YSB2735 | MAT $\alpha$ . tsa1 $\Delta$ ::NAT-STM#169 tsa3 $\Delta$ ::NEO                                      | YSB1204 | (9)        |
| YSB1667 | MAT $\alpha$ . trx1 $\Delta$ ::NAT-STM#234                                                          | H99     | (9)        |
| YSB1791 | MAT $\alpha$ . trx2 $\Delta$ ::NEO                                                                  | H99     | (9)        |
| YSB1796 | MAT $\alpha$ . trx1 $\Delta$ ::NAT-STM#234 trx2 $\Delta$ ::NEO                                      | YSB1667 | (9)        |
| YSB3785 | MAT $\alpha$ . rad53 $\Delta$ ::NAT-STM#184                                                         | H99     | (10)       |
| SG50    | MAT $\alpha$ . cat1::URA5 ura5                                                                      | H99     | (11)       |
| SG51    | MAT $\alpha$ . cat2::NAT                                                                            | H99     | (11)       |
| SG52    | MAT $\alpha$ . cat3::URA5 ura5                                                                      | H99     | (11)       |
| SG53    | MAT $\alpha$ . cat4::URA5 ura5                                                                      | H99     | (11)       |
| SG61    | MAT $\alpha$ . cat1::URA5 cat2::NAT cat3::URA5 ura5 cat3::URA5 cat4::NEO ura5                       | SG60    | (11)       |
| KW24    | MAT $\alpha$ . rdh54 $\Delta$ ::NAT-STM#234                                                         | H99     | This study |
| KW78    | MAT $\alpha$ . rdh54 $\Delta$ ::NAT-STM#234                                                         | H99     | This study |
| KW25    | MAT $\alpha$ . rad54 $\Delta$ ::NAT-STM#234                                                         | H99     | This study |
| KW26    | MAT $\alpha$ . rad54 $\Delta$ ::NAT-STM#234                                                         | H99     | This study |
| KW362   | MAT $\alpha$ . rad51 $\Delta$ ::NAT-STM#56                                                          | H99     | This study |
| KW363   | MAT $\alpha$ . rad51 $\Delta$ ::NAT-STM#56                                                          | H99     | This study |
| KW21    | MAT $\alpha$ . pso2 $\Delta$ ::NAT-STM#234                                                          | H99     | This study |
| KW22    | MAT $\alpha$ . pso2 $\Delta$ ::NAT-STM#234                                                          | H99     | This study |
| KW94    | MAT $\alpha$ . rig1 $\Delta$ ::NAT-STM#230                                                          | H99     | This study |
| KW158   | MAT $\alpha$ . rig1 $\Delta$ ::NAT-STM#230                                                          | H99     | This study |
| KW112   | MAT $\alpha$ . rig2 $\Delta$ ::NAT-STM#234                                                          | H99     | This study |
| KW160   | MAT $\alpha$ . rig2 $\Delta$ ::NAT-STM#234                                                          | H99     | This study |
| KW95    | MAT $\alpha$ . rig3 $\Delta$ ::NAT-STM#230                                                          | H99     | This study |
| KW96    | MAT $\alpha$ . rig3 $\Delta$ ::NAT-STM#230                                                          | H99     | This study |
| KW137   | MAT $\alpha$ . bdr1 $\Delta$ ::NAT-STM#230                                                          | H99     | This study |
| KW138   | MAT $\alpha$ . bdr1 $\Delta$ ::NAT-STM#230                                                          | H99     | This study |
| KW193   | MAT $\alpha$ . bdr1 $\Delta$ ::NAT-STM#230 BDR1-NEO                                                 | KW137   | This study |
| KW219   | MAT $\alpha$ . bdr1 $\Delta$ ::NAT-STM#230 BDR1:GFP-NEO                                             | KW137   | This study |
| KW86    | MAT $\alpha$ . atg8 $\Delta$ ::NAT-STM#5                                                            | H99     | This study |
| KW87    | MAT $\alpha$ . atg8 $\Delta$ ::NAT-STM#5                                                            | H99     | This study |
| KW296   | MAT $\alpha$ . atg3 $\Delta$ ::NAT-STM#230                                                          | H99     | This study |
| KW297   | MAT $\alpha$ . atg3 $\Delta$ ::NAT-STM#230                                                          | H99     | This study |
| KW292   | MAT $\alpha$ . atg4 $\Delta$ ::NAT-STM#230                                                          | H99     | This study |
| KW293   | MAT $\alpha$ . atg4 $\Delta$ ::NAT-STM#230                                                          | H99     | This study |
| YSB1025 | MAT $\alpha$ . cat1 $\Delta$ ::NAT-STM#177                                                          | H99     | This study |
| YSB1026 | MAT $\alpha$ . cat1 $\Delta$ ::NAT-STM#177                                                          | H99     | This study |
| YSB1029 | MAT $\alpha$ . cat2 $\Delta$ ::NAT-STM#288                                                          | H99     | This study |
| YSB1030 | MAT $\alpha$ . cat2 $\Delta$ ::NAT-STM#288                                                          | H99     | This study |

|         |                                                                     |     |            |
|---------|---------------------------------------------------------------------|-----|------------|
| YSB1033 | <i>MAT<math>\alpha</math>. cat3<math>\Delta</math>::NAT-STM#169</i> | H99 | This study |
| YSB1034 | <i>MAT<math>\alpha</math>. cat3<math>\Delta</math>::NAT-STM#169</i> | H99 | This study |
| YSB1037 | <i>MAT<math>\alpha</math>. cat4<math>\Delta</math>::NAT-STM#146</i> | H99 | This study |
| YSB1038 | <i>MAT<math>\alpha</math>. cat4<math>\Delta</math>::NAT-STM#146</i> | H99 | This study |
| KW198   | <i>MAT<math>\alpha</math>. PH3:BDR1-NEO</i>                         | H99 | This study |
| KW199   | <i>MAT<math>\alpha</math>. PH3:BDR1-NEO</i>                         | H99 | This study |

Each *NAT-STM#* indicates the Nat<sup>r</sup> marker with a unique signature tag.

## References

1. **Brachmann CB, Davies A, Cost GJ, Caputo E, Li J, Hieter P, Boeke JD.** 1998. Designer deletion strains derived from *Saccharomyces cerevisiae* S288C: a useful set of strains and plasmids for PCR-mediated gene disruption and other applications. *Yeast* **14**:115-132.
2. **Gillum AM, Tsay EY, Kirsch DR.** 1984. Isolation of the *Candida albicans* gene for orotidine-5'-phosphate decarboxylase by complementation of *S. cerevisiae ura3* and *E. coli pyrF* mutations. *Mol Gen Genet* **198**:179-182.
3. **Cormack BP, Falkow S.** 1999. Efficient homologous and illegitimate recombination in the opportunistic yeast pathogen *Candida glabrata*. *Genetics* **151**:979-987.
4. **Perfect JR, Ketabchi N, Cox GM, Ingram CW, Beiser CL.** 1993. Karyotyping of *Cryptococcus neoformans* as an epidemiological tool. *J Clin Microbiol* **31**:3305-3309.
5. **Moore TD, Edman JC.** 1993. The  $\alpha$ -mating type locus of *Cryptococcus neoformans* contains a peptide pheromone gene. *Mol Cell Biol* **13**:1962-1970.
6. **Kidd SE, Hagen F, Tschärke RL, Huynh M, Bartlett KH, Fyfe M, Macdougall L, Boekhout T, Kwon-Chung KJ, Meyer W.** 2004. A rare genotype of *Cryptococcus gattii* caused the cryptococcosis outbreak on Vancouver Island (British Columbia, Canada). *Proc Natl Acad Sci USA* **101**:17258-17263.

7. **Cheon SA, Jung KW, Chen YL, Heitman J, Bahn YS, Kang HA.** 2011. Unique evolution of the UPR pathway with a novel bZIP transcription factor, Hxl1, for controlling pathogenicity of *Cryptococcus neoformans*. *PLoS Pathog* **7**:e1002177.
8. **Jung KW, Yang DH, Maeng S, Lee KT, So YS, Hong J, Choi J, Byun HJ, Kim H, Bang S, Song MH, Lee JW, Kim MS, Kim SY, Ji JH, Park G, Kwon H, Cha S, Meyers GL, Wang LL, Jang J, Janbon G, Adedoyin G, Kim T, Averette AK, Heitman J, Cheong E, Lee YH, Lee YW, Bahn YS.** 2015. Systematic functional profiling of transcription factor networks in *Cryptococcus neoformans*. *Nat Commun* **6**:6757.
9. **Upadhy R, Kim H, Jung KW, Park G, Lam W, Lodge JK, Bahn YS.** 2013. Sulphiredoxin plays peroxiredoxin-dependent and -independent roles via the HOG signalling pathway in *Cryptococcus neoformans* and contributes to fungal virulence. *Mol Microbiol* **90**:630-648.
10. **Lee KT, So YS, Yang DH, Jung KW, Choi J, Lee DG, Kwon H, Jang J, Wang LL, Cha S, Meyers GL, Jeong E, Jin JH, Lee Y, Hong J, Bang S, Ji JH, Park G, Byun HJ, Park S, Park YM, Adedoyin G, Kim T, Averette AK, Choi JS, Heitman J, Cheong E, Lee YH, Bahn YS.** 2016. Systematic fungal analysis of kinases in the fungal pathogen *Cryptococcus neoformans*. *Nat Commun* **7**:12766.
11. **Giles SS, Stajich JE, Nichols C, Gerrald QD, Alspaugh JA, Dietrich F, Perfect JR.** 2006. The *Cryptococcus neoformans* catalase gene family and its role in antioxidant defense. *Eukaryot Cell* **5**:1447-1459.
