# Supplementary material for: Unraveling Fungal Radiation Resistance Regulatory Networks through the Genome-Wide Transcriptome and Genetic Analyses of Cryptococcus neoformans
Source: PubMed Central journal article supplement (PMC5137497; doi:10.1128/mbio.01483-16), 2016-11-29
Supplement: mbo006163087st2.pdf [file mbo006163087st2.pdf]

**Table S2.** Primers used in this study

| Primer Name | Sequence (5'–3')                        | Comment                                                    |
|-------------|-----------------------------------------|------------------------------------------------------------|
| B79         | TGTGGATGCTGGCGGAGGATA                   | Screening primer on <i>ACT1</i> promoter                   |
| B1026       | GTAAACGACGGCCAGTGAGC                    | M13 forward (extended)                                     |
| B1027       | CAGGAAACAGCTATGACCATG                   | M13 reverse (extended)                                     |
| B1454       | AAGGTGTTCCCCGACGACGAATCG                | NSL2                                                       |
| B1455       | AACTCCGTCGCGAGCCCCATCAAC                | NSR2                                                       |
| B1886       | TGGAAGAGATGGATGTGC                      | NSL-NEO                                                    |
| B1887       | ATTGTCTGTTGTGCCAG                       | NSR-NEO                                                    |
| B679        | CGCCCTTGCTCCTTCTCTATG                   | <i>ACT1</i> qRT primer 1                                   |
| B680        | GACTCGTCGTATTCGCTCTTCG                  | <i>ACT1</i> qRT primer 2                                   |
| J61         | TCCCCGCCTCACTTCAATC                     | <i>ERG1</i> (CNAG_06829) qRT primer 1                      |
| J62         | AGGAAGACCCTGGATGGAG                     | <i>ERG1</i> (CNAG_06829) qRT primer 2                      |
| B1720       | ATCCCTTTTACCCGTCGCTC                    | <i>ERG3</i> (CNAG_00519) qRT primer 1                      |
| B6839       | GTGATGTTCTAATCTTCTA                     | <i>ERG3</i> (CNAG_00519) qRT primer 2                      |
| B671        | GTTTTGTTGCCTGAGAACTGGG                  | <i>ERG5</i> (CNAG_06644) qRT primer 1                      |
| B672        | GTAGATACTGAGACCTGCTTGGTG                | <i>ERG5</i> (CNAG_06644) qRT primer 2                      |
| B677        | AATCTCCTTACCAGCCATTCGG                  | <i>ERG11</i> (CNAG_00040) qRT primer 1                     |
| B678        | TTCAGGGAACCTGGGAACAGC                   | <i>ERG11</i> (CNAG_00040) qRT primer 2                     |
| J1          | TGGTGGTGAGGGAAAATG                      | <i>RAD51</i> (CNAG_00720) qRT primer 1                     |
| J2          | GCACCTTCCACCATCAAG                      | <i>RAD51</i> (CNAG_00720) qRT primer 2                     |
| J3          | AAAGCGATGAGGATGACC                      | <i>RDH54</i> (CNAG_02771) qRT primer 1                     |
| J4          | CTCGTCTTTTTCAGCACG                      | <i>RDH54</i> (CNAG_02771) qRT primer 2                     |
| J5          | GCAAAATCTTTCAGCGTGTG                    | <i>RAD54</i> (CNAG_01163) qRT primer 1                     |
| J6          | CACAAAGTTTCGGGGTTG                      | <i>RAD54</i> (CNAG_01163) qRT primer 2                     |
| J11         | ACTGAAGCCCAAGTCCACC                     | <i>PSO2</i> (CNAG_03160) qRT primer 1                      |
| J12         | CCTAAGACTCGGTCGAAATGG                   | <i>PSO2</i> (CNAG_03160) qRT primer 2                      |
| J47         | AGGCCCTGAACGAGAAGC                      | <i>RDH54</i> (CNAG_02771) –5' screening primer             |
| J48         | AGAGCCGAGACATTGTGAG                     | <i>RDH54</i> (CNAG_02771)– left flanking primer 1          |
| J49         | TCACTGGCCGTCGTTTACTGAAGGTGAAGGATGGCATG  | <i>RDH54</i> (CNAG_02771) – left flanking primer 2         |
| J50         | CATGGTCATAGCTGTTTCTGGATGCTTGATGCGGCAC   | <i>RDH54</i> (CNAG_02771) – right flanking primer 1        |
| J51         | TTCCAAGCAGCAGCTCTC                      | <i>RDH54</i> (CNAG_02771) – right flanking primer 2        |
| J52         | TCACTGGTCCCACCTCG                       | <i>RDH54</i> (CNAG_02771) – probe primer for Southern blot |
| J29         | CAGCAAGAATGAAATCGGGTC                   | <i>RAD54</i> (CNAG_01163) –5' screening primer             |
| J30         | GCCCAAGTGTAAATGAGACG                    | <i>RAD54</i> (CNAG_01163) – left flanking primer 1         |
| J31         | TCACTGGCCGTCGTTTTACTGGAGATGATGCCGTAGC   | <i>RAD54</i> (CNAG_01163) – left flanking primer 2         |
| J32         | CATGGTCATAGCTGTTTCTGTTGAGAGCGGAATTGGGTC | <i>RAD54</i> (CNAG_01163) – right flanking primer 1        |
| J33         | TCCTAGTCTGGCAGTACC                      | <i>RAD54</i> (CNAG_01163) – right flanking primer 2        |
| J34         | TGGTCGTCCATAGGATTGTG                    | <i>RAD54</i> (CNAG_01163) – probe primer for Southern blot |
| J53         | TCACCTTCTCTCGTCATC                      | <i>PSO2</i> (CNAG_03160) –5' screening primer              |
| J54         | AGCTGTGTTCTCAGTC                        | <i>PSO2</i> (CNAG_03160) – left flanking primer 1          |
| J55         | TCACTGGCCGTCGTTTTACAATAAGGAGCGTCCCAC    | <i>PSO2</i> (CNAG_03160) – left flanking primer 2          |
| J56         | CATGGTCATAGCTGTTTCTGCGGACGAAACATACGTG   | <i>PSO2</i> (CNAG_03160) – right flanking primer 1         |
| J57         | TTCCCTAGCGGCAGTTATC                     | <i>PSO2</i> (CNAG_03160) – right flanking primer 2         |
| J58         | GATCTTGTGTCCTCGACC                      | <i>PSO2</i> (CNAG_03160) – probe primer for Southern blot  |
| C53         | CTCTGAGGACGACAAGGACA                    | <i>KAR2</i> (CNAG_06443) qRT primer 1                      |
| C54         | AGCTCAGAAAGCTGCTCCTC                    | <i>KAR2</i> (CNAG_06443) qRT primer 2                      |
| J276        | ATGAAGTCGCAGAGGAGC                      | <i>LHS1</i> (CNAG_03899) qRT primer 1                      |
| J277        | TATCCCTCGCACGGTACTC                     | <i>LHS1</i> (CNAG_03899) qRT primer 2                      |
| J278        | CGTCTACGGTGATGAGTCC                     | <i>PDI1</i> (CNAG_06240) qRT primer 1                      |
| J279        | CTACCAAGAGTGTCCCAG                      | <i>PDI1</i> (CNAG_06240) qRT primer 2                      |
| J280        | ACACTCTCGCCTTACACATTC                   | <i>SCJ1</i> (CNAG_05252) qRT primer 1                      |
| J281        | ACATCGCCGCTTCCATATC                     | <i>SCJ1</i> (CNAG_05252) qRT primer 2                      |
| J76         | ATTGGGCGCAGGCTTATG                      | <i>UBC1</i> (CNAG_02906) qRT primer 1                      |
| J77         | ATGTTCTCAGCCAGTCC                       | <i>UBC1</i> (CNAG_02906) qRT primer 2                      |
| J78         | CCCAGCTTACACAACAACAC                    | <i>UBC6</i> (CNAG_05765) qRT primer 2                      |
| J79         | CCATCGCAACTGAACAAC                      | <i>UBC6</i> (CNAG_05765) qRT primer 2                      |

|      |                                           |                                                                       |
|------|-------------------------------------------|-----------------------------------------------------------------------|
| J80  | TTCTGAAGCTGAGCACTTGG                      | <i>UBC62</i> (CNAG_02214) qRT primer 1                                |
| J81  | ATCTGTGGCTTCCGCTTG                        | <i>UBC62</i> (CNAG_02214) qRT primer 2                                |
| J82  | CCACTCCTGCATCCCAATATC                     | <i>UBC7</i> (CNAG_02238) qRT primer 1                                 |
| J83  | CGTTCGGAAGCAGACTCATA                      | <i>UBC7</i> (CNAG_02238) qRT primer 2                                 |
| J220 | TAACTCAGCGCCATCC                          | <i>RIG1</i> (CNAG_04055) qRT primer 1                                 |
| J221 | CACATCGGCGTTCATCTCG                       | <i>RIG1</i> (CNAG_04055) qRT primer 2                                 |
| J198 | ATTCGGGTGTAAGCCTG                         | <i>RIG2</i> (CNAG_03659) qRT primer 1                                 |
| J199 | AGAGGCTGGAATAGACGAGG                      | <i>RIG2</i> (CNAG_03659) qRT primer 2                                 |
| J218 | AGACTGATCGCCAAGGTG                        | <i>RIG3</i> (CNAG_03813) qRT primer 1                                 |
| J219 | ATGTGCATGTCCCAGGTAG                       | <i>RIG3</i> (CNAG_03813) qRT primer 2                                 |
| J230 | ATACCGATCAGCCATAGAC                       | <i>RIG1</i> (CNAG_04055) -5' screening primer                         |
| J231 | TGGAGAGGAAAGAAGTGAGG                      | <i>RIG1</i> (CNAG_04055) - left flanking primer 1                     |
| J232 | TCACTGGCCGTCGTTTTACAATGTGATGACGGGCGTTG    | <i>RIG1</i> (CNAG_04055) - left flanking primer 2                     |
| J233 | CATGGTCATAGCTGTTTCTGGAACGCCGATGTGACAACC   | <i>RIG1</i> (CNAG_04055) - right flanking primer 1                    |
| J234 | GAAGTTGACTCGGCGAGG                        | <i>RIG1</i> (CNAG_04055) - right flanking primer 2                    |
| J235 | CATCCGCATACCCGTCATC                       | <i>RIG1</i> (CNAG_04055) - probe primer for Southern blot             |
| J200 | CGCCCTATGTTGGATAATC                       | <i>RIG2</i> (CNAG_03659) -5' screening primer                         |
| J201 | GCACAAGCGGAATAGACTC                       | <i>RIG2</i> (CNAG_03659) - left flanking primer 1                     |
| J202 | TCACTGGCCGTCGTTTTACACACCGACTTGCCACTTAC    | <i>RIG2</i> (CNAG_03659) - left flanking primer 2                     |
| J203 | CATGGTCATAGCTGTTTCTGAGAAGACTGGCAGAGAATCC  | <i>RIG2</i> (CNAG_03659) - right flanking primer 1                    |
| J204 | TTCCACCAATAACGCTCG                        | <i>RIG2</i> (CNAG_03659) - right flanking primer 2                    |
| J205 | AATCAGGAATCTACGACGG                       | <i>RIG2</i> (CNAG_03659) - probe primer for Southern blot             |
| J236 | ACCGGCAGAGTAATCGTC                        | <i>RIG3</i> (CNAG_03813) -5' screening primer                         |
| J237 | TCCCGTGAGCAACACGATG                       | <i>RIG3</i> (CNAG_03813) - left flanking primer 1                     |
| J238 | TCACTGGCCGTCGTTTTACACGCTTACTTGTGCCATG     | <i>RIG3</i> (CNAG_03813) - left flanking primer 2                     |
| J239 | CATGGTCATAGCTGTTTCTGCTTAGGTCAAGTGTGCGCCTC | <i>RIG3</i> (CNAG_03813) - right flanking primer 1                    |
| J240 | TCAACAATCCGTCGCAAC                        | <i>RIG3</i> (CNAG_03813) - right flanking primer 2                    |
| J241 | GTCCTGCAATCACAACCTGG                      | <i>RIG3</i> (CNAG_03813) - probe primer for Southern blot             |
| J254 | ATATCAACCGCCGATCAGCAC                     | <i>BDR1</i> (CNAG_02589) - qRT primer 1                               |
| J255 | TCCCTAATTCGTTGTTACGCAC                    | <i>BDR1</i> (CNAG_02589) - qRT primer 2                               |
| J282 | GCGGGTAGACATCAAATGC                       | <i>BDR1</i> (CNAG_02589) -5' screening primer                         |
| J283 | TAGCGCCCAACCAATCC                         | <i>BDR1</i> (CNAG_02589) - left flanking primer 1                     |
| J270 | TCACTGGCCGTCGTTTTACAGAACTCTTCCACACGATG    | <i>BDR1</i> (CNAG_02589) - left flanking primer 2                     |
| J271 | CATGGTCATAGCTGTTTCTGCTTACTGGGAATGATGG     | <i>BDR1</i> (CNAG_02589) - right flanking primer 1                    |
| J272 | CATCAAACCTCTCAAACCC                       | <i>BDR1</i> (CNAG_02589) - right flanking primer 2                    |
| J273 | ATTCGTTGTTACGCACG                         | <i>BDR1</i> (CNAG_02589) - probe primer for Southern blot             |
| J299 | GCGGCCGCACTAACCGCGCAAAATACCT              | <i>BDR1</i> (CNAG_02589) - primer 1 for complementation               |
| J300 | GCGGCCGCTCATTGATCTCTGTGATGT               | <i>BDR1</i> (CNAG_02589) - primer 2 for complementation               |
| J301 | TGTTCTGCCACTCGCTTG                        | <i>BDR1</i> (CNAG_02589) - primer 1 for sequencing                    |
| J302 | CGATGTGCTGATCCCATTC                       | <i>BDR1</i> (CNAG_02589) - primer 2 for sequencing                    |
| J303 | AGGAGAGATGGACATTGACAAC                    | <i>BDR1</i> (CNAG_02589) - primer 3 for sequencing                    |
| J304 | TTGGAGTCAACAGCCGTGG                       | <i>BDR1</i> (CNAG_02589) - primer 4 for sequencing                    |
| J319 | GGATCCGCGGCCGCTCATTGATCTCTGTGATGTT        | <i>BDR1</i> (CNAG_02589) - terminator primer 1 for cloning            |
| J320 | AGCTCCTCGCCTTGCTCACCATTCCAAGACCGATGATTAC  | <i>BDR1</i> (CNAG_02589) - promoter primer 1 for cloning              |
| J323 | GGATCCCAACCCGCTTTCTAGAC                   | <i>BDR1</i> (CNAG_02589) - exon primer 1 for cloning                  |
| J321 | ATGGTGAGCAAGGGCGAGGAGCT                   | Primer 1 for GFP cloning                                              |
| J322 | GGATCCAGAGCCACCGCCACCCTTGTACAGCTCGTCCATGC | Primer 2 for GFP cloning                                              |
| J311 | GATGGTCATCGCCGACTTG                       | <i>BDR1</i> (CNAG_02589) -5' screening primer for overexpression      |
| J312 | GGCAATGCCGACTCTATCC                       | <i>BDR1</i> (CNAG_02589) - left flanking primer 1 for overexpression  |
| J313 | CACTGAATCCTGCATGCTTCCAAGACCGATGATTACA     | <i>BDR1</i> (CNAG_02589) - left flanking primer 2 for overexpression  |
| J314 | ACCACAACACATCTATCACATGCCAACCCGCTTTCTAG    | <i>BDR1</i> (CNAG_02589) - right flanking primer 1 for overexpression |
| J273 | ATTCGTTGTTACGCACG                         | <i>BDR1</i> (CNAG_02589) - right flanking primer 2 for overexpression |
| J603 | ATATCAACCGCCGATCAGC                       | <i>BDR1</i> (CNK00770) - qRT primer 1 for serotype D JEC21            |
| J604 | TTCCCTGATTCTGCTGTTAC                      | <i>BDR1</i> (CNK00770) - qRT primer 2 for serotype D JEC21            |
| J605 | AACGGATTTCTCGGGTCG                        | <i>RAD51</i> (CNA06990) - qRT primer 1 for serotype D JEC21           |
| J606 | CAGCAACGCCAAACTCATC                       | <i>RAD51</i> (CNA06990) - qRT primer 2 for serotype D JEC21           |
| J607 | GGCAGCAGAAATTGAGGGAC                      | <i>RDH54</i> (CNC03920) - qRT primer 1 for serotype D JEC21           |
| J608 | TCCCTCGTTTCGCTACAG                        | <i>RDH54</i> (CNC03920) - qRT primer 2 for serotype D JEC21           |

|       |                                          |                                                             |
|-------|------------------------------------------|-------------------------------------------------------------|
| J609  | GTCGCAGTAAGCGGTATGG                      | <i>RAD54</i> (CND02890) - qRT primer 1 for serotype D JEC21 |
| J610  | TTCCTTGCTTTCGGGCTG                       | <i>RAD54</i> (CND02890) - qRT primer 2 for serotype D JEC21 |
| J611  | TAACTCAGCGCCATC                          | <i>RIG1</i> (CNB05390) - qRT primer 1 for serotype D JEC21  |
| J612  | GGTTGTTACATCGCGCTTC                      | <i>RIG1</i> (CNB05390) - qRT primer 2 for serotype D JEC21  |
| J613  | TGATGTGTTAAGGCGGCTG                      | <i>RIG2</i> (CNB01590) - qRT primer 1 for serotype D JEC21  |
| J614  | AGCGGGAGTTTGTGCTCTTG                     | <i>RIG2</i> (CNB01590) - qRT primer 2 for serotype D JEC21  |
| J615  | CAGCAACCCCTGAGACAAGC                     | <i>RIG3</i> (CNB03040) - qRT primer 1 for serotype D JEC21  |
| J616  | TTTACTGTCCCGATGATCTC                     | <i>RIG3</i> (CNB03040) - qRT primer 2 for serotype D JEC21  |
| J170  | CGCAGGTCTCGAATCTGTC                      | <i>ATG4</i> (CNAG_02662) - qRT primer 1                     |
| J171  | TCGTTGACGGGAGAGGAAG                      | <i>ATG4</i> (CNAG_02662) - qRT primer 2                     |
| J172  | CACAACCTGCGAGCGTAC                       | <i>ATG3</i> (CNAG_06892) - qRT primer 1                     |
| J173  | GGTTCAGTAATAGGCGCTGG                     | <i>ATG3</i> (CNAG_06892) - qRT primer 2                     |
| J176  | AGGATCCCGTGATCTGTG                       | <i>ATG8</i> (CNAG_00816) - qRT primer 1                     |
| J177  | GACGAATTGCCAACAGTAAG                     | <i>ATG8</i> (CNAG_00816) - qRT primer 2                     |
| J182  | ATCCAGAGGGGTGAGAGAG                      | <i>ATG8</i> (CNAG_00816) - 5' screening primer              |
| J183  | ATCTGAGACTGATGTTGGG                      | <i>ATG8</i> (CNAG_00816) - left flanking primer 1           |
| J184  | TCACTGGCCGTCGTTTTACATGGGATGTGAGATAGCGG   | <i>ATG8</i> (CNAG_00816) - left flanking primer 2           |
| J185  | CATGGTCATAGCTGTTTCTGCGACGGCCTTATGAGTTC   | <i>ATG8</i> (CNAG_00816) - right flanking primer 1          |
| J186  | ACCGTGATTGTGTTCTG                        | <i>ATG8</i> (CNAG_00816) - right flanking primer 2          |
| J187  | TCTTCTCAGCCTTCTCACAG                     | <i>ATG8</i> (CNAG_00816) - probe primer for Southern blot   |
| J426  | TTCCGGCTCCATCTCATC                       | <i>ATG3</i> (CNAG_06892) - 5' screening primer              |
| J427  | ATGCGGAGAGGATGATCG                       | <i>ATG3</i> (CNAG_06892) - left flanking primer 1           |
| J428  | TCACTGGCCGTCGTTTTACAAGTCTCTTGCCTGGATG    | <i>ATG3</i> (CNAG_06892) - left flanking primer 2           |
| J429  | CATGGTCATAGCTGTTTCTGTCGACCGTATGGAAGCTG   | <i>ATG3</i> (CNAG_06892) - right flanking primer 1          |
| J430  | CATCAACTCCAGCACAACC                      | <i>ATG3</i> (CNAG_06892) - right flanking primer 2          |
| J441  | TGGGATGCACAATCCTCAC                      | <i>ATG3</i> (CNAG_06892) - probe primer for Southern blot   |
| J431  | CCCTCAATGGATGCTGGAC                      | <i>ATG4</i> (CNAG_02662) - 5' screening primer              |
| J432  | CCATCTGGAAGGAAGACC                       | <i>ATG4</i> (CNAG_02662) - left flanking primer 1           |
| J433  | TCACTGGCCGTCGTTTTACAACGCTGAGGTAATGCTGC   | <i>ATG4</i> (CNAG_02662) - left flanking primer 2           |
| J434  | CATGGTCATAGCTGTTTCTGATTGGAAGAGCCCGGAAC   | <i>ATG4</i> (CNAG_02662) - right flanking primer 1          |
| J435  | GAAGATGCACGCACGGAAG                      | <i>ATG4</i> (CNAG_02662) - right flanking primer 2          |
| J442  | AAGACTGGTAGGCGATGG                       | <i>ATG4</i> (CNAG_02662) - probe primer for Southern blot   |
| B865  | ATTCATCGGGGGTTATC                        | <i>CAT1</i> (CNAG_04981) - 5' screening primer              |
| B861  | AACGGGAATGGGAAGTCTC                      | <i>CAT1</i> (CNAG_04981) - left flanking primer 1           |
| B862  | CTGGCCGTCGTTTTACCTTGGTTGAGCATTGTC        | <i>CAT1</i> (CNAG_04981) - left flanking primer 2           |
| B863  | GTCATAGCTGTTTCTGTCGCTTCAAGTTCAGTTGCTAAGC | <i>CAT1</i> (CNAG_04981) - right flanking primer 1          |
| B864  | ATGTTGCTTTGGGTGTC                        | <i>CAT1</i> (CNAG_04981) - right flanking primer 2          |
| B1925 | GCAAGCAACCTTTTCTG                        | <i>CAT1</i> (CNAG_04981) - probe primer for Southern blot   |
| B859  | CATTTGACATTACAGGGTGG                     | <i>CAT2</i> (CNAG_05256) - 5' screening primer              |
| B855  | CGTCCACAACATCTTAC                        | <i>CAT2</i> (CNAG_05256) - left flanking primer 1           |
| B856  | CTGGCCGTCGTTTACGTATGTGGGTGTTTTCTCAGTC    | <i>CAT2</i> (CNAG_05256) - left flanking primer 2           |
| B857  | GTCATAGCTGTTTCTGGCTCAACAGGGAAAGTAAAGG    | <i>CAT2</i> (CNAG_05256) - right flanking primer 1          |
| B858  | TGATACCGCAACCAGTCC                       | <i>CAT2</i> (CNAG_05256) - right flanking primer 2          |
| B860  | AAGAGTCGGCGGTGTGTTTC                     | <i>CAT2</i> (CNAG_05256) - probe primer for Southern blot   |
| B871  | ATGCGGAAAAGCCTGTAG                       | <i>CAT3</i> (CNAG_00575) - 5' screening primer              |
| B867  | ACAAGGGGTGTTCAATAG                       | <i>CAT3</i> (CNAG_00575) - left flanking primer 1           |
| B868  | CTGGCCGTCGTTTTACACCTTGACCCGAAATACG       | <i>CAT3</i> (CNAG_00575) - left flanking primer 2           |
| B869  | GTCATAGCTGTTTCTGCATAGGGTTTGGGACAGAG      | <i>CAT3</i> (CNAG_00575) - right flanking primer 1          |
| B870  | TGGACGAGAAGAAGAGCAC                      | <i>CAT3</i> (CNAG_00575) - right flanking primer 2          |
| B872  | ATCCAGTTTCTTCTGTC                        | <i>CAT3</i> (CNAG_00575) - probe primer for Southern blot   |
| B853  | TTCAAGCCGTAGCACACAGTTTC                  | <i>CAT4</i> (CNAG_05015) - 5' screening primer              |
| B849  | CGTTGGCAAGGAAGTATG                       | <i>CAT4</i> (CNAG_05015) - left flanking primer 1           |
| B850  | CTGGCCGTCGTTTTACTACCAGAGGCAAGTTACG       | <i>CAT4</i> (CNAG_05015) - left flanking primer 2           |
| B851  | GTCATAGCTGTTTCTGTGGTCTCTCAGAAGACTC       | <i>CAT4</i> (CNAG_05015) - right flanking primer 1          |
| B852  | TGATTTGACCAACTCCG                        | <i>CAT4</i> (CNAG_05015) - right flanking primer 2          |
| B854  | GGTCCCTATCTTCTCGTATG                     | <i>CAT4</i> (CNAG_05015) - probe primer for Southern blot   |
| J389  | GCCACTCAAGACTGATCCTAC                    | <i>SRX1</i> (CNAG_00654) - qRT primer 1                     |
| J390  | CGTTTCCATCCAGTCTC                        | <i>SRX1</i> (CNAG_00654) - qRT primer 2                     |
| J391  | GATGTTGAGGAGCAAGAGGAC                    | <i>TRX1</i> (CNAG_02801) - qRT primer 1                     |
| J392  | CCGGTAACAGTCTCGATCAC                     | <i>TRX1</i> (CNAG_02801) - qRT primer 2                     |

---

|      |                       |                                         |
|------|-----------------------|-----------------------------------------|
| J393 | GCCGTGTTCTCACTCCTTTAC | <i>TRX2</i> (CNAG_01607) - qRT primer 1 |
| J394 | CTTGGCAGCAACTTCAGG    | <i>TRX2</i> (CNAG_01607) - qRT primer 2 |
| J395 | CATGGACTTCACCTTCGTTTG | <i>TSA1</i> (CNAG_03482) - qRT primer 1 |
| J396 | CGGTGGAGACACAGATGAC   | <i>TSA1</i> (CNAG_03482) - qRT primer 2 |
| J397 | AAGCAGATCCGTCTCACC    | <i>TSA3</i> (CNAG_06917) - qRT primer 1 |
| J398 | CGGTGTTTATCGCCAAGC    | <i>TSA3</i> (CNAG_06917) - qRT primer 2 |
| J399 | ACCAACGGCTGTACCTCTG   | <i>SOD1</i> (CNAG_01019) - qRT primer 1 |
| J400 | ATATTACCGAGGTCACCAACG | <i>SOD1</i> (CNAG_01019) - qRT primer 2 |
| J401 | CAAGGCCACCAAGAAGCTC   | <i>SOD2</i> (CNAG_04388) - qRT primer 1 |
| J402 | TAGAAAGCGTGCTCCAG     | <i>SOD2</i> (CNAG_04388) - qRT primer 2 |
| J403 | TTATTCACGCGGTAAGGGAG  | <i>CAT1</i> (CNAG_04981) - qRT primer 1 |
| J404 | GAAATCTCCAGGCAAGCAAG  | <i>CAT1</i> (CNAG_04981) - qRT primer 2 |
| J405 | ACCGAGACAACGGATGAGG   | <i>CAT2</i> (CNAG_05256) - qRT primer 1 |
| J406 | TGACACGAGACATTGGTGATC | <i>CAT2</i> (CNAG_05256) - qRT primer 2 |
| J407 | TGCCTTCGTATCCAAGCTC   | <i>CAT3</i> (CNAG_00575) - qRT primer 1 |
| J408 | ATTGCGTAGCATTGCCGAC   | <i>CAT3</i> (CNAG_00575) - qRT primer 2 |
| J409 | ATCGCCTGATCTTGAGC     | <i>CAT4</i> (CNAG_05015) - qRT primer 1 |
| J410 | CGCCAAAGCCATTATGAGTAC | <i>CAT4</i> (CNAG_05015) - qRT primer 2 |
| J96  | TCTGGATACAGGGCGGAAG   | <i>LAC1</i> (CNAG_03465) - qRT primer 1 |
| J97  | TCCCTCAGTAAGATGCCAC   | <i>LAC1</i> (CNAG_03465) - qRT primer 2 |
| J98  | GTTTCAGTTGATGGGACGAGG | <i>LAC2</i> (CNAG_03464) - qRT primer 1 |
| J99  | TCCAAATCGTATCCTTCCTCG | <i>LAC2</i> (CNAG_03464) - qRT primer 2 |

---
